# Supplementary material for: What Do I Want to Be with My PhD? The Roles of Personal Values and Structural Dynamics in Shaping the Career Interests of Recent Biomedical Science PhD Graduates
Source: Atypon-hosted journal article supplement (doi:10.1187/cbe.13-02-0021), 2013-12-01
Supplement: combinedsupmats1.pdf [file combinedsupmats1.pdf]

# Supplemental Material

*CBE—Life Sciences Education*

Gibbs *et al.*

| Pseudonym | Interest in Faculty Career | Sex    | Race/Ethnicity         | Underrepresented Minority (URM) Background | Ph.D. from Top 50 University? | Peer Reviewed Publications |       | h-index | Years to Ph.D. | Years Since Ph.D. Completion | Position During Focus Group | Ever a Postdoc? | Quality of Ph.D. Advisor Relationship |
|-----------|----------------------------|--------|------------------------|--------------------------------------------|-------------------------------|----------------------------|-------|---------|----------------|------------------------------|-----------------------------|-----------------|---------------------------------------|
|           |                            |        |                        |                                            |                               | 1st-Autho                  | Total |         |                |                              |                             |                 |                                       |
| Aaron     | Low                        | Male   | African-American/Black | Yes                                        | No                            | 0                          | 2     | 3       | 7              | 3                            | Postdoc                     | Yes             | Not Described                         |
| Alicia    | High                       | Female | African-American/Black | Yes                                        | Yes                           | 8                          | 10    | 4       | 5              | 3                            | Postdoc                     | Yes             | Positive                              |
| Angela    | High                       | Female | White                  | No                                         | No                            | 1                          | 3     | 3       | 7              | 4                            | Postdoc                     | Yes             | Mixed/Negative                        |
| Anika     | Low                        | Female | African-American/Black | Yes                                        | Yes                           | 5                          | 9     | 8       | 4              | 3                            | Policy                      | Yes             | Mixed/Negative                        |
| Ann       | High                       | Female | White                  | No                                         | No                            | 2                          | 9     | 7       | 6              | 3                            | Postdoc                     | Yes             | Positive                              |
| Audrey    | High                       | Female | Asian                  | No                                         | Yes                           | 8                          | 20    | 10      | 6              | 6                            | Policy                      | Yes             | Not Described                         |
| Christina | High                       | Female | African-American/Black | Yes                                        | Yes                           | 2                          | 5     | 3       | 4              | 2                            | Postdoc                     | Yes             | Mixed/Negative                        |
| Claudia   | High                       | Female | African-American/Black | Yes                                        | No                            | 2                          | 12    | 8       | 5              | unk                          | Postdoc                     | Yes             | Mixed/Negative                        |
| Daniel    | High                       | Male   | Hispanic/Latino        | Yes                                        | No                            | 5                          | 6     | 2       | 5              | 2                            | Postdoc                     | Yes             | Mixed/Negative                        |
| Darren    | Unknown                    | Male   | African-American/Black | Yes                                        | Yes                           | 3                          | 7     | unk     | 6              | 6                            | Postdoc                     | Yes             | Not Described                         |
| Deborah   | Low                        | Female | Hispanic/Latino        | Yes                                        | Yes                           | 1                          | 2     | 2       | 7              | 1                            | Policy                      | No              | Not Described                         |
| Eric      | High                       | Male   | White                  | No                                         | Yes                           | 4                          | 10    | 6       | 6              | 1                            | Postdoc                     | Yes             | Positive                              |
| Erin      | High                       | Female | White                  | No                                         | Yes                           | 4                          | 10    | 6       | 5              | 2                            | Postdoc                     | Yes             | Mixed/Negative                        |
| Eva       | High                       | Female | Hispanic/Latino        | Yes                                        | Yes                           | 1                          | 2     | 2       | 8              | 1                            | Unemployed                  | No              | Mixed/Negative                        |
| Jack      | Low                        | Male   | White                  | No                                         | Yes                           | 5                          | 17    | 8       | 5              | 5                            | Research Scientist          | Yes             | Positive                              |
| Jasmine   | Low                        | Female | White                  | No                                         | Yes                           | 2                          | 3     | 3       | 7              | 6                            | Project Manager             | No              | Mixed/Negative                        |
| Jessica   | High                       | Female | White                  | No                                         | Yes                           | 2                          | 2     | 1       | 6              | 1                            | Postdoc                     | Yes             | Positive                              |
| Jordan    | Low                        | Male   | White                  | No                                         | No                            | 3                          | 3     | 3       | 6              | 2                            | Policy                      | No              | Positive                              |
| Judy      | High                       | Female | White                  | No                                         | n/a                           | 2                          | 5     | 4       | 5.5            | 1                            | Postdoc                     | Yes             | Not Described                         |
| Lara      | Low                        | Female | African-American/Black | Yes                                        | Yes                           | 1                          | 5     | 2       | 5              | 3                            | Policy                      | Yes             | Positive                              |
| Lauren    | Low                        | Female | Asian                  | No                                         | Yes                           | 1                          | 1     | 1       | 6.5            | 2                            | Policy                      | No              | Positive                              |
| Leticia   | High                       | Female | Hispanic/Latino        | Yes                                        | No                            | 1                          | 2     | 1       | 5              | 3                            | Unemployed                  | No              | Positive                              |
| Mandy     | Low                        | Female | White                  | No                                         | Yes                           | 4                          | 5     | 5       | 5.25           | 2                            | Policy                      | Yes             | Mixed/Negative                        |
| Mark      | High                       | Male   | White                  | No                                         | Yes                           | 11                         | 13    | 6       | 6              | 5                            | Policy                      | Yes             | Positive                              |
| Matt      | Low                        | Male   | White                  | No                                         | Yes                           | 7                          | 10    | 8       | 4.5            | 2                            | Policy                      | Yes             | Positive                              |
| Melanie   | Low                        | Female | African-American/Black | Yes                                        | Yes                           | 2                          | 4     | 4       | 5.25           | 2                            | Postdoc                     | Yes             | Positive                              |
| Meredith  | High                       | Female | White                  | No                                         | Yes                           | 0                          | 6     | 5       | 5.33           | 1                            | Policy                      | No              | Positive                              |
| Nancy     | High                       | Female | White                  | No                                         | Yes                           | 4                          | 7     | 4       | 6              | 5                            | Postdoc                     | Yes             | Mixed/Negative                        |
| Natalie   | Low                        | Female | African-American/Black | Yes                                        | Yes                           | 5                          | 8     | 3       | 4.5            | 2                            | Postdoc                     | Yes             | Positive                              |
| Pam       | High                       | Female | Asian                  | No                                         | Yes                           | 12                         | 26    | 11      | 5              | 4                            | Postdoc                     | Yes             | Mixed/Negative                        |
| Robert    | High                       | Male   | African-American/Black | Yes                                        | Yes                           | 2                          | 5     | 4       | 6              | 1                            | Postdoc                     | Yes             | Mixed/Negative                        |
| Robin     | Low                        | Female | African-American/Black | Yes                                        | Yes                           | 1                          | 4     | 2       | 6.5            | 1                            | Research Analyst            | No              | Mixed/Negative                        |
| Rodney    | Low                        | Male   | White                  | No                                         | Yes                           | 1                          | 8     | 5       | 4              | 2                            | Postdoc                     | Yes             | Not Described                         |
| Steve     | Low                        | Male   | African-American/Black | Yes                                        | Yes                           | 3                          | 7     | 5       | 6              | 4                            | Policy                      | No              | Mixed/Negative                        |
| Thomas    | High                       | Male   | White                  | No                                         | No                            | 8                          | 14    | 8       | 6              | 6                            | Postdoc                     | Yes             | Positive                              |
| Tim       | Low                        | Male   | African-American/Black | Yes                                        | Yes                           | 2                          | 19    | 10      | 6              | 2                            | Postdoc                     | Yes             | Positive                              |
| Trent     | Low                        | Male   | White                  | No                                         | No                            | 3                          | 7     | 5       | 5              | 2                            | Policy                      | No              | Positive                              |
| Will      | Low                        | Male   | African-American/Black | Yes                                        | Yes                           | 3                          | 11    | 7       | 6              | 1                            | Postdoc                     | Yes             | Positive                              |
